# Supplementary material for: Measuring Burden of Unhealthy Behaviours Using a Multivariable Predictive Approach: Life Expectancy Lost in Canada Attributable to Smoking, Alcohol, Physical Inactivity, and Diet
Source: PubMed Central journal article supplement (PMC4986987; doi:10.1371/journal.pmed.1002082), 2016-08-16
Supplement: pmed.1002082.s007.pdf [file pmed.1002082.s007.pdf]

**S2 Table.** Crude and age standardized death rates per 10000 person-years for sociodemographic groups

|                                      | Males        |        |            |                                | Females      |        |            |                                |
|--------------------------------------|--------------|--------|------------|--------------------------------|--------------|--------|------------|--------------------------------|
|                                      | Person-years | Deaths | Crude rate | Age standardised rate (95% CI) | Person-years | Deaths | Crude rate | Age standardised rate (95% CI) |
| Total                                | 285,035      | 3,766  | 132.1      | 96.1 (92.9, 99.3)              | 340,532      | 3,978  | 116.8      | 89.7 (86.7, 92.7)              |
| Neighbourhood Deprivation            |              |        |            |                                |              |        |            |                                |
| Low                                  | 57,529       | 580    | 100.8      | 78.5 (71.3, 86.2)              | 64,863       | 519    | 80.0       | 77.5 (70.0, 85.6)              |
| Moderate                             | 177,395      | 2,359  | 133.0      | 95.2 (91.3, 99.3)              | 211,730      | 2,476  | 116.9      | 88.1 (84.4, 91.9)              |
| High                                 | 43,934       | 722    | 164.3      | 123.6 (114.5, 133.2)           | 56,063       | 845    | 150.7      | 109.4 (101.8, 117.3)           |
| Missing                              | 6,176        | 105    | 170.0      | 105.7 (85.91, 128.66)          | 7,876        | 138    | 175.2      | 96.8 (79.5, 116.7)             |
| Education                            |              |        |            |                                |              |        |            |                                |
| Less than secondary school           | 50,340       | 1,474  | 292.8      | 125.6 (117.5, 134.0)           | 65,182       | 1,715  | 263.1      | 107.6 (100.7, 114.7)           |
| Secondary school                     | 70,331       | 714    | 101.5      | 93.2 (86.3, 100.5)             | 89,642       | 957    | 106.8      | 87.3 (81.5, 93.5)              |
| Post-secondary                       | 161,625      | 1,505  | 93.1       | 81.8 (77.5, 86.3)              | 183,369      | 1,245  | 66.9       | 77.5 (72.8, 82.5)              |
| Missing                              | 2,739        | 73     | 266.5      | 126.8 (93.3, 168.4)            | 2,339        | 61     | 260.8      | 109.9 (76.4, 153.0)            |
| Immigration Status                   |              |        |            |                                |              |        |            |                                |
| Non-immigrant or >45 years in Canada | 241,213      | 3,456  | 143.3      | 99.2 (95.8, 102.7)             | 290,950      | 3,709  | 127.5      | 91.7 (88.6, 94.9)              |
| Immigrated <15 years                 | 14,074       | 24     | 17.1       | 40.8 (24.3, 64.2)              | 16,265       | 27     | 16.6       | 105.9 (22.6, 304.8)            |
| Immigrated 16 to 30 years            | 12,980       | 68     | 52.4       | 78.5 (56.7, 106.0)             | 13,838       | 69     | 49.9       | 79.8 (58.9, 105.8)             |
| Immigrated 31 to 45 years            | 16,427       | 208    | 126.6      | 79.5 (67.0, 93.7)              | 19,025       | 157    | 82.5       | 78.0 (55.2, 107.0)             |
| Missing                              | 341          | 10     | 293.5      | 130.1 (57.2, 253.4)            | 455          | 16     | 351.5      | 157.3 (83.6, 269.3)            |
| Ethnicity                            |              |        |            |                                |              |        |            |                                |
| White                                | 252,293      | 3,555  | 140.9      | 97.3 (94.0, 100.7)             | 304,395      | 3,809  | 125.1      | 90.5 (87.4, 93.6)              |
| Non-white                            | 31,793       | 187    | 58.8       | 78.9 (67.4, 91.8)              | 35,131       | 157    | 44.7       | 75.2 (61.7, 90.7)              |
| Missing                              | 948          | 24     | 253.1      | 117.3 (71.3, 181.8)            | 1006         | 12     | 119.3      | 79.7 (39.8, 142.6)             |
