# Supplementary material for: Measuring Burden of Unhealthy Behaviours Using a Multivariable Predictive Approach: Life Expectancy Lost in Canada Attributable to Smoking, Alcohol, Physical Inactivity, and Diet
Source: PubMed Central journal article supplement (PMC4986987; doi:10.1371/journal.pmed.1002082), 2016-08-16
Supplement: pmed.1002082.s009.pdf [file pmed.1002082.s009.pdf]

**S4 Table.** Crude and age standardized death rates per 10000 person-years for geographic groups

|                                    | Males        |        |            |                                | Females      |        |            |                                |
|------------------------------------|--------------|--------|------------|--------------------------------|--------------|--------|------------|--------------------------------|
|                                    | Person-years | Deaths | Crude rate | Age standardised rate (95% CI) | Person-years | Deaths | Crude rate | Age standardised rate (95% CI) |
| Total                              | 285,035      | 3,766  | 132.1      | 96.1 (92.9, 99.3)              | 340,532      | 3,978  | 116.8      | 89.7 (86.7, 92.7)              |
| Local Health Integration Network   |              |        |            |                                |              |        |            |                                |
| Erie St. Clair                     | 20,135       | 274    | 136.1      | 109.4 (95.2, 125.1)            | 23,927       | 333    | 139.2      | 98.1 (87.3, 109.8)             |
| South West                         | 35,950       | 512    | 142.4      | 95.5 (87.0, 104.6)             | 42,684       | 544    | 127.5      | 91.3 (83.3, 100.0)             |
| Waterloo Wellington                | 17,548       | 196    | 111.7      | 84.5 (72.5, 98.0)              | 20,539       | 204    | 99.3       | 84.1 (70.6, 99.4)              |
| Hamilton Niagara Haldimand Brant   | 35,907       | 527    | 146.8      | 99.6 (90.8, 109.1)             | 43,523       | 557    | 128.0      | 92.3 (84.1, 101.0)             |
| Central West                       | 9,292        | 93     | 100.1      | 103.2 (80.9, 129.9)            | 10,188       | 93     | 91.3       | 90.1 (72.3, 111.1)             |
| Mississauga Halton                 | 14,178       | 121    | 85.3       | 73.3 (58.5, 90.6)              | 15,935       | 135    | 84.7       | 81.7 (68.1, 97.2)              |
| Toronto Central                    | 10,738       | 86     | 80.1       | 79.3 (62.9, 98.6)              | 12,474       | 121    | 97.0       | 87.8 (72.1, 106.0)             |
| Central                            | 16,725       | 138    | 82.5       | 68.5 (57.2, 81.2)              | 19,045       | 165    | 86.6       | 74.6 (63.0, 87.9)              |
| Central East                       | 27,008       | 364    | 134.8      | 93.4 (83.7, 103.9)             | 33,274       | 389    | 116.9      | 88.8 (79.9, 98.5)              |
| South East                         | 17,612       | 308    | 174.9      | 112.4 (99.4, 126.6)            | 22,164       | 283    | 127.7      | 91.7 (80.7, 103.9)             |
| Champlain                          | 26,230       | 336    | 128.1      | 96.1 (85.8, 107.2)             | 32,931       | 342    | 103.9      | 83.2 (73.7, 93.5)              |
| North Simcoe Muskoka               | 12,525       | 152    | 121.4      | 84.8 (71.3, 100.2)             | 14,461       | 191    | 132.1      | 90.0 (77.1, 104.4)             |
| North East                         | 28,868       | 477    | 165.2      | 116.1 (105.1, 127.9)           | 35,506       | 448    | 126.2      | 96.5 (86.6, 107.2)             |
| North West                         | 12,231       | 182    | 148.8      | 109.5 (93.2, 127.9)            | 13,822       | 173    | 125.2      | 88.6 (75.5, 103.4)             |
| Missing                            | 87           | 0      | 0.0        | 0.0 (0.0, 0.0)                 | 60           | 0      | 0.00       | 0.0 (0.0, 0.0)                 |
| Census Metropolitan Area (CMA)     |              |        |            |                                |              |        |            |                                |
| CMA: ≥1.5 million                  | 56,703       | 489    | 86.2       | 75.2 (68.5, 82.5)              | 64,771       | 588    | 90.8       | 82.4 (75.7, 89.6)              |
| CMA: 500,000-1,499,999             | 29,488       | 345    | 117.0      | 92.2 (82.6, 102.7)             | 36,136       | 355    | 98.2       | 80.2 (71.2, 90.1)              |
| CMA: 100,000- 499,999              | 90,931       | 1,225  | 134.7      | 101.1 (95.2, 107.3)            | 110,499      | 1,366  | 123.6      | 92.9 (87.7, 98.3)              |
| CMA: 10,000- 99,999                | 45,592       | 770    | 168.9      | 110.3 (102.2, 118.8)           | 56,718       | 766    | 135.1      | 97.0 (89.5, 105.0)             |
| Non-CMA: strong MIZ <sup>a</sup>   | 21,303       | 299    | 140.4      | 95.2 (84.5, 107.0)             | 24,728       | 258    | 104.3      | 82.1 (71.8, 93.5)              |
| Non-CMA: moderate MIZ <sup>a</sup> | 24,402       | 401    | 164.3      | 102.1 (91.0, 114.2)            | 28,845       | 398    | 138.0      | 92.7 (83.2, 103.0)             |
| Other                              | 16,616       | 237    | 142.6      | 95.0 (82.6, 108.7)             | 18,835       | 247    | 131.1      | 95.7 (83.3, 109.4)             |

<sup>a</sup>Metropolitan Influenced Zone
