# Supplementary material for: Measuring Burden of Unhealthy Behaviours Using a Multivariable Predictive Approach: Life Expectancy Lost in Canada Attributable to Smoking, Alcohol, Physical Inactivity, and Diet
Source: PubMed Central journal article supplement (PMC4986987; doi:10.1371/journal.pmed.1002082), 2016-08-16
Supplement: pmed.1002082.s010.pdf [file pmed.1002082.s010.pdf]

**S5 Table.** Male derivation, validation and application data

|                              | Model Development (Deaths=2953) |                                                        |                                                       | Canadian National Cohort                                           | Sensitivity Analysis                                                 |
|------------------------------|---------------------------------|--------------------------------------------------------|-------------------------------------------------------|--------------------------------------------------------------------|----------------------------------------------------------------------|
|                              | Model 1<br>Age & Behaviours     | Model 2<br>Model 1 +<br>Sociodemographic<br>Indicators | Full Model (MPoRT)<br>Model 2 + Disease<br>Indicators | Full Model Using<br>National Cohort<br>(CCHS 2.1)<br>(Deaths=1793) | Full Model Without<br>Years 1 and 2 of<br>Follow-Up<br>(Deaths=2281) |
| Age                          | 1.10 (1.09, 1.11)               | 1.10 (1.09, 1.11)                                      | 1.09 (1.08, 1.10)                                     | 1.09 (1.08, 1.10)                                                  | 1.09 (1.08, 1.10)                                                    |
| Age above spline knot        | 1.02 (1.00, 1.03)               | 1.02 (1.01, 1.03)                                      | 1.03 (1.02, 1.04)                                     | 1.02 (1.01, 1.04)                                                  | 1.03 (1.02, 1.04)                                                    |
| Smoking                      |                                 |                                                        |                                                       |                                                                    |                                                                      |
| Heavy                        | 3.01 (2.67, 3.40)               | 2.82 (2.49, 3.18)                                      | 2.83 (2.50, 3.20)                                     | 2.81 (2.43, 3.26)                                                  | 3.27 (2.84, 3.76)                                                    |
| Former heavy (quit 10 years) | 1.76 (1.66, 1.88)               | 1.70 (1.60, 1.81)                                      | 1.71 (1.60, 1.82)                                     | 1.70 (1.58, 1.84)                                                  | 1.84 (1.71, 1.97)                                                    |
| Former heavy (quit 20 years) | 1.34 (1.30, 1.38)               | 1.31 (1.27, 1.36)                                      | 1.32 (1.27, 1.36)                                     | 1.31 (1.26, 1.37)                                                  | 1.37 (1.32, 1.42)                                                    |
| Former heavy (quit 30 years) | 1.16 (1.14, 1.18)               | 1.15 (1.13, 1.17)                                      | 1.15 (1.13, 1.17)                                     | 1.15 (1.13, 1.17)                                                  | 1.17 (1.15, 1.20)                                                    |
| Light                        | 2.49 (2.22, 2.80)               | 2.42 (2.06, 2.58)                                      | 2.46 (2.19, 2.76)                                     | 2.17 (1.86, 2.52)                                                  | 2.58 (2.26, 2.96)                                                    |
| Former light (quit 10 years) | 1.60 (1.51, 1.70)               | 1.57 (1.48, 1.67)                                      | 1.59 (1.50, 1.69)                                     | 1.49 (1.38, 1.61)                                                  | 1.63 (1.52, 1.74)                                                    |
| Former light (quit 20 years) | 1.27 (1.23, 1.31)               | 1.26 (1.22, 1.30)                                      | 1.27 (1.23, 1.31)                                     | 1.23 (1.12, 1.20)                                                  | 1.28 (1.24, 1.33)                                                    |
| Former light (quit 30 years) | 1.11 (1.11, 1.15)               | 1.13 (1.11, 1.15)                                      | 1.13 (1.11, 1.15)                                     | 1.11 (1.09, 1.13)                                                  | 1.14 (1.12, 1.16)                                                    |
| Non-smoker                   | Reference                       | Reference                                              | Reference                                             | Reference                                                          | Reference                                                            |
| Physical activity (METs/day) |                                 |                                                        |                                                       |                                                                    |                                                                      |
| 0                            | 1.65 (1.50, 1.80)               | 1.63 (1.49, 1.78)                                      | 1.53 (1.39, 1.67)                                     | 1.67 (1.49, 1.89)                                                  | 1.39 (1.26, 1.55)                                                    |
| 1                            | 1.28 (1.23, 1.34)               | 1.28 (1.22, 1.34)                                      | 1.24 (1.18, 1.29)                                     | 1.29 (1.22, 1.37)                                                  | 1.18 (1.12, 1.25)                                                    |
| 2                            | 1.11 (1.09, 1.13)               | 1.11 (1.09, 1.13)                                      | 1.09 (1.07, 1.11)                                     | 1.11 (1.09, 1.14)                                                  | 1.07 (1.05, 1.10)                                                    |
| 3                            | Reference                       | Reference                                              | Reference                                             | Reference                                                          | Reference                                                            |
| Diet score                   |                                 |                                                        |                                                       |                                                                    |                                                                      |
| 0                            | 1.43 (1.19, 1.71)               | 1.32 (1.10, 1.59)                                      | 1.41 (1.17, 1.70)                                     | 1.47 (1.15, 1.87)                                                  | 1.43 (1.15, 1.76)                                                    |
| 2                            | 1.33 (1.15, 1.54)               | 1.25 (1.08, 1.45)                                      | 1.32 (1.14, 1.53)                                     | 1.36 (1.12, 1.65)                                                  | 1.33 (1.12, 1.57)                                                    |
| 4                            | 1.24 (1.11, 1.38)               | 1.18 (1.06, 1.32)                                      | 1.23 (1.10, 1.37)                                     | 1.26 (1.09, 1.46)                                                  | 1.24 (1.09, 1.41)                                                    |
| 6                            | 1.15 (1.07, 1.24)               | 1.12 (1.04, 1.20)                                      | 1.15 (1.07, 1.24)                                     | 1.16 (1.06, 1.28)                                                  | 1.15 (1.06, 1.25)                                                    |
| 8                            | 1.07 (1.03, 1.11)               | 1.06 (1.02, 1.10)                                      | 1.07 (1.03, 1.11)                                     | 1.08 (1.03, 1.13)                                                  | 1.07 (1.02, 1.12)                                                    |
| 10                           | Reference                       | Reference                                              | Reference                                             | Reference                                                          | Reference                                                            |
| Alcohol                      |                                 |                                                        |                                                       |                                                                    |                                                                      |
| Heavy drinker                | 0.98 (0.87, 1.10)               | 0.96 (0.85, 1.09)                                      | 1.05 (0.93, 1.19)                                     | 1.16 (0.99, 1.35)                                                  | 1.33 (1.15, 1.53)                                                    |
| Moderate drinker             | 0.77 (0.70, 0.83)               | 0.78 (0.72, 0.85)                                      | 0.82 (0.76, 0.90)                                     | 0.71 (0.72, 0.91)                                                  | 1.09 (0.97, 1.23)                                                    |
| Light drinker                | Reference                       | Reference                                              | Reference                                             | Reference                                                          | Reference                                                            |
| Neighbourhood deprivation    |                                 |                                                        |                                                       |                                                                    |                                                                      |
| High                         |                                 | 1.32 (1.17, 1.49)                                      | 1.25 (1.10, 1.41)                                     | 1.11 (0.93, 1.33)                                                  | 1.33 (1.15, 1.53)                                                    |
| Moderate                     |                                 | 1.09 (0.99, 1.21)                                      | 1.07 (0.97, 1.19)                                     | 1.05 (0.89, 1.22)                                                  | 1.09 (0.97, 1.23)                                                    |
| Low                          |                                 | Reference                                              | Reference                                             | Reference                                                          | Reference                                                            |
| Education                    |                                 |                                                        |                                                       |                                                                    |                                                                      |

|                                                              |                    |                     |                     |                     |
|--------------------------------------------------------------|--------------------|---------------------|---------------------|---------------------|
| < High school                                                | 1.19 (1.10, 1.30)  | 1.20 (1.11, 1.31)   | 1.19 (1.06, 1.32)   | 1.19 (1.08, 1.31)   |
| High school graduate                                         | 1.08 (0.98, 1.20)  | 1.09 (0.99, 1.20)   | 1.08 (0.94, 1.24)   | 1.09 (0.98, 1.22)   |
| Post-secondary graduate                                      | Reference          | Reference           | Reference           | Reference           |
| Years since immigration                                      |                    |                     |                     |                     |
| 0 to 15                                                      | 0.36 (0.21, 0.64)  | 0.37 (0.21, 0.66)   | 0.83 (0.50, 1.38)   | 0.33 (0.16, 0.69)   |
| 16 to 30                                                     | 0.63 (0.47, 0.84)  | 0.67 (0.50, 0.90)   | 0.50 (0.29, 0.86)   | 0.59 (0.41, 0.85)   |
| 31 to 45                                                     | 0.86 (0.73, 1.02)  | 0.89 (0.75, 1.05)   | 1.09 (0.85, 1.40)   | 1.01 (0.84, 1.21)   |
| >45 or born in Canada                                        | Reference          | Reference           | Reference           | Reference           |
| Heart disease                                                |                    |                     |                     |                     |
| Yes                                                          |                    | 1.46 (1.35, 1.58)   | 1.42 (1.28, 1.58)   | 1.40 (1.28, 1.55)   |
| No                                                           |                    | Reference           | Reference           | Reference           |
| Suffers from previous stroke                                 |                    |                     |                     |                     |
| Yes                                                          |                    | 1.25 (1.07, 1.47)   | 1.45 (1.19, 1.75)   | 1.23 (1.02, 1.48)   |
| No                                                           |                    | Reference           | Reference           | Reference           |
| Cancer                                                       |                    |                     |                     |                     |
| Yes                                                          |                    | 2.09** (1.86, 2.34) | 2.22** (1.91, 2.57) | 1.81** (1.56, 2.09) |
| No                                                           |                    | Reference           | Reference           | Reference           |
| Diabetes                                                     |                    |                     |                     |                     |
| Yes                                                          |                    | 1.55** (1.41, 1.70) | 1.55** (1.37, 1.75) | 1.64** (1.48, 1.81) |
| No                                                           |                    | Reference           | Reference           | Reference           |
| Body mass index (kg/m <sup>2</sup> )                         |                    |                     |                     |                     |
| 45                                                           |                    | 1.36 (1.13, 1.62)   | 1.42 (0.99, 1.43)   | 1.35 (1.10, 1.66)   |
| 40                                                           |                    | 1.16 (1.07, 1.27)   | 1.19 (0.99, 2.06)   | 1.16 (1.05, 1.29)   |
| <35                                                          |                    | Reference           | Reference           | Reference           |
| <b>Model Assessment</b>                                      |                    |                     |                     |                     |
| Discrimination                                               |                    |                     |                     |                     |
| C-stat (95% CI)                                              | 0.862(0.854-0.869) | 0.863 (0.856-0.871) | 0.874 (0.867-0.881) |                     |
| Ratio of 90 <sup>th</sup> : 10 <sup>th</sup> risk percentile | 291.03             | 306.88              | 312.48              |                     |
| Calibration                                                  |                    |                     |                     |                     |
| Subgroups with >20% difference                               | 6 (10.3%)          | 4 (6.9%)            | 0 (0.0%)            |                     |
| Subgroups with >10% difference                               | 14 (24.1%)         | 9 (15.5%)           | 4 (6.9%)            |                     |
