# Supplementary material for: Measuring Burden of Unhealthy Behaviours Using a Multivariable Predictive Approach: Life Expectancy Lost in Canada Attributable to Smoking, Alcohol, Physical Inactivity, and Diet
Source: PubMed Central journal article supplement (PMC4986987; doi:10.1371/journal.pmed.1002082), 2016-08-16
Supplement: pmed.1002082.s013.pdf [file pmed.1002082.s013.pdf]

**S8 Table.** MPoRT beta coefficients for male and female models

| Parameter             | Description                                                              | Male      | Female    |
|-----------------------|--------------------------------------------------------------------------|-----------|-----------|
| Age_cont              | Time-varying age (see S11 Table)                                         | 0.08314   | 0.08919   |
| Age_spline            | Time-varying age above knot (see S11 Table)                              | 0.03286   | 0.02922   |
| QSLight_df            | Time-varying function for light and former light smokers (see S11 Table) | 0.90032   | 0.80685   |
| QSHeavy_df            | Time-varying function for heavy and former heavy smokers (see S11 Table) | 1.03950   | 1.18030   |
| PhysicalActivity_cont | Log transformation of physical activity <sup>y</sup>                     | -0.70311  | -0.92835  |
| DietScore_cont        | Diet score (see S5 Table)                                                | -0.03441  | -0.04367  |
| AlcoholHeavy_cat      | Heavy drinker (see Table 1)                                              | 0.05088   | 0.07970   |
| AlcoholMod_cat        | Moderate drinker (see Table 1)                                           | -0.19270  | -0.20063  |
|                       | Light or non-drinker (see Table 1)                                       | Reference | Reference |
| DepIndHigh_cat        | High neighbourhood deprivation                                           | 0.22010   | 0.20488   |
| DepIndMod_cat         | Moderate neighbourhood deprivation                                       | 0.06906   | 0.04659   |
|                       | Low neighbourhood deprivation                                            | Reference | Reference |
| EduNoGrad_cat         | Less than high school education                                          | 0.18571   | 0.06313   |
| EduHSGrad_cat         | High school graduate                                                     | 0.08632   | 0.03271   |
|                       | Post-secondary graduate                                                  | Reference | Reference |
| ImEth0To15_cat        | Immigrated to Canada ≤15 years ago                                       | -0.98263  | -0.60422  |
| ImEth16To30_cat       | Immigrated to Canada 16 to ≤30 years ago                                 | -0.40429  | -0.22603  |
| ImEth31To45_cat       | Immigrated to Canada 31 to ≤45 years ago                                 | -0.11708  | -0.13251  |
|                       | Non-immigrant or in Canada >45 years                                     | Reference | Reference |
| HeartDis_cat          | Has heart disease                                                        | 0.37945   | 0.34187   |
| Stroke_cat            | Suffers from a previous stroke                                           | 0.22416   | 0.23591   |
| Cancer_cat            | Has cancer                                                               | 4.40894   | 4.85672   |
| Diabetes_cat          | Has diabetes                                                             | 1.98474   | 1.16018   |
| BMI_spline            | Units of BMI above 35                                                    | 0.03048   | 0.02407   |
| CancerAge_int         | Interaction between cancer status and time-varying age                   | -0.04978  | -0.05256  |
| DiabetesAge_int       | Interaction between diabetes status and time-varying age                 | -0.02097  | -0.00943  |

<sup>y</sup>Daily measures of physical activity exceeding 10 METs were coded as 10 METs before log transformation
