# Supplementary material for: Measuring Burden of Unhealthy Behaviours Using a Multivariable Predictive Approach: Life Expectancy Lost in Canada Attributable to Smoking, Alcohol, Physical Inactivity, and Diet
Source: PLOS journal article supplement (doi:10.1371/journal.pmed.1002082), 2016-08-16
Supplement: S18 (10.1371/journal.pmed.1002082.s018) [file journal.pmed.1002082.s018]

**S4 Text.** STROBE Statement—checklist of items that should be included in reports of observational studies

|                          | Item No | Recommendation                                                                                                                                                                             |                                                                                                                                                                                                                                                                                                                                              |
|--------------------------|---------|--------------------------------------------------------------------------------------------------------------------------------------------------------------------------------------------|----------------------------------------------------------------------------------------------------------------------------------------------------------------------------------------------------------------------------------------------------------------------------------------------------------------------------------------------|
| Title and abstract       | 1       | (a) Indicate the study’s design with a commonly used term in the title or the abstract                                                                                                     | Included title and abstract                                                                                                                                                                                                                                                                                                                  |
|                          |         | (b) Provide in the abstract an informative and balanced summary of what was done and what was found                                                                                        | Included                                                                                                                                                                                                                                                                                                                                     |
| Introduction             |         |                                                                                                                                                                                            |                                                                                                                                                                                                                                                                                                                                              |
| Background/rationale     | 2       | Explain the scientific background and rationale for the investigation being reported                                                                                                       | Included paragraphs 1-4                                                                                                                                                                                                                                                                                                                      |
| Objectives               | 3       | State specific objectives, including any prespecified hypotheses                                                                                                                           | Included paragraph 5                                                                                                                                                                                                                                                                                                                         |
| Methods                  |         |                                                                                                                                                                                            |                                                                                                                                                                                                                                                                                                                                              |
| Study design             | 4       | Present key elements of study design early in the paper                                                                                                                                    | Included <i>Study Data</i> paragraph 1                                                                                                                                                                                                                                                                                                       |
| Setting                  | 5       | Describe the setting, locations, and relevant dates, including periods of recruitment, exposure, follow-up, and data collection                                                            | Included <i>Derivation Cohort</i> and <i>Validation Cohorts</i>                                                                                                                                                                                                                                                                              |
| Participants             | 6       | (a) <i>Cohort study</i> —Give the eligibility criteria, and the sources and methods of selection of participants. Describe methods of follow-up                                            | Included <i>Study Data</i> paragraphs 2-3                                                                                                                                                                                                                                                                                                    |
|                          |         | <i>Case-control study</i> —Give the eligibility criteria, and the sources and methods of case ascertainment and control selection. Give the rationale for the choice of cases and controls |                                                                                                                                                                                                                                                                                                                                              |
|                          |         | <i>Cross-sectional study</i> —Give the eligibility criteria, and the sources and methods of selection of participants                                                                      |                                                                                                                                                                                                                                                                                                                                              |
|                          |         | (b) <i>Cohort study</i> —For matched studies, give matching criteria and number of exposed and unexposed                                                                                   | n/a                                                                                                                                                                                                                                                                                                                                          |
|                          |         | <i>Case-control study</i> —For matched studies, give matching criteria and the number of controls per case                                                                                 |                                                                                                                                                                                                                                                                                                                                              |
| Variables                | 7       | Clearly define all outcomes, exposures, predictors, potential confounders, and effect modifiers. Give diagnostic criteria, if applicable                                                   | Included <i>Risk factors for death</i>                                                                                                                                                                                                                                                                                                       |
| Data sources/measurement | 8*      | For each variable of interest, give sources of data and details of methods of assessment (measurement). Describe comparability of assessment methods if there is more than one group       | Included <i>S1 Table</i> and <i>S3 Text</i>                                                                                                                                                                                                                                                                                                  |
| Bias                     | 9       | Describe any efforts to address potential sources of bias                                                                                                                                  | Included <i>Table 4</i> and <i>Limitations</i> paragraph 2                                                                                                                                                                                                                                                                                   |
| Study size               | 10      | Explain how the study size was arrived at                                                                                                                                                  | All Ontario respondents of the linked Canadian Community Health Survey who met eligibility requirements were included. There were approximately 1 million person-years of follow-up and 9,900 deaths in the development and validation datasets. We calculated degrees of freedom (df) as per recommendation of Harrell: 1 df per 10 events. |

|                        |     |                                                                                                                                                                                                                                                                                                           |                                                                                                                                     |
|------------------------|-----|-----------------------------------------------------------------------------------------------------------------------------------------------------------------------------------------------------------------------------------------------------------------------------------------------------------|-------------------------------------------------------------------------------------------------------------------------------------|
| Quantitative variables | 11  | Explain how quantitative variables were handled in the analyses. If applicable, describe which groupings were chosen and why                                                                                                                                                                              | Included <i>Risk factors for death</i> paragraphs 2-4 and <i>Development of MPoRT algorithm</i> paragraphs 2-3                      |
| Statistical methods    | 12  | (a) Describe all statistical methods, including those used to control for confounding                                                                                                                                                                                                                     | Included <i>Development of MPoRT algorithm</i>                                                                                      |
|                        |     | (b) Describe any methods used to examine subgroups and interactions                                                                                                                                                                                                                                       | Included <i>Development of MPoRT algorithm</i> paragraph 3-4                                                                        |
|                        |     | (c) Explain how missing data were addressed                                                                                                                                                                                                                                                               | Included <i>Development of MPoRT algorithm</i> paragraph 4                                                                          |
|                        |     | (d) <i>Cohort study</i> —If applicable, explain how loss to follow-up was addressed<br><i>Case-control study</i> —If applicable, explain how matching of cases and controls was addressed<br><i>Cross-sectional study</i> —If applicable, describe analytical methods taking account of sampling strategy | n/a                                                                                                                                 |
|                        |     | (e) Describe any sensitivity analyses                                                                                                                                                                                                                                                                     | Included <i>Development of MPoRT algorithm</i> paragraph 3, <i>Validation of predictive accuracy and assessment of risk hazards</i> |
| Results                |     |                                                                                                                                                                                                                                                                                                           |                                                                                                                                     |
| Participants           | 13* | (a) Report numbers of individuals at each stage of study—eg numbers potentially eligible, examined for eligibility, confirmed eligible, included in the study, completing follow-up, and analysed                                                                                                         | Included <i>S1 Fig</i>                                                                                                              |
|                        |     | (b) Give reasons for non-participation at each stage                                                                                                                                                                                                                                                      | Included <i>S1 Fig</i>                                                                                                              |
|                        |     | (c) Consider use of a flow diagram                                                                                                                                                                                                                                                                        | Included <i>S1 Fig</i>                                                                                                              |
| Descriptive data       | 14* | (a) Give characteristics of study participants (eg demographic, clinical, social) and information on exposures and potential confounders                                                                                                                                                                  | Included <i>Table 2</i> and <i>Table 3</i>                                                                                          |
|                        |     | (b) Indicate number of participants with missing data for each variable of interest                                                                                                                                                                                                                       | Included <i>Table 4, S2 Table, S3 Table, and S4 Table</i>                                                                           |
|                        |     | (c) <i>Cohort study</i> —Summarise follow-up time (eg, average and total amount)                                                                                                                                                                                                                          | Included <i>Table 4, S2 Table, S3 Table, and S4 Table</i>                                                                           |
| Outcome data           | 15* | <i>Cohort study</i> —Report numbers of outcome events or summary measures over time                                                                                                                                                                                                                       | Included <i>Table 4, S2 Table, S3 Table, and S4 Table</i>                                                                           |
|                        |     | <i>Case-control study</i> —Report numbers in each exposure category, or summary measures of exposure                                                                                                                                                                                                      | n/a                                                                                                                                 |
|                        |     | <i>Cross-sectional study</i> —Report numbers of outcome events or summary measures                                                                                                                                                                                                                        | n/a                                                                                                                                 |
| Main results           | 16  | (a) Give unadjusted estimates and, if applicable, confounder-adjusted estimates and their precision (eg, 95% confidence interval). Make clear which confounders were adjusted for and why they were included                                                                                              | Included <i>unadjusted Table 4, S2 Table, S3 Table, and S4 Table; adjusted S5 Table and S6 Table</i>                                |
|                        |     | (b) Report category boundaries when continuous variables were categorized                                                                                                                                                                                                                                 | Included <i>Table 4, S2 Table, S3 Table, and S4 Table</i>                                                                           |
|                        |     | (c) If relevant, consider translating estimates of relative risk into absolute risk for a meaningful time period                                                                                                                                                                                          | Included <i>MPoRT 5-year predicted risk</i>                                                                                         |

|                          |    |                                                                                                                                                                            |                                                                     |
|--------------------------|----|----------------------------------------------------------------------------------------------------------------------------------------------------------------------------|---------------------------------------------------------------------|
| Other analyses           | 17 | Report other analyses done—eg analyses of subgroups and interactions, and sensitivity analyses                                                                             | Included <i>S5 Table</i> and <i>S6 Table</i>                        |
| <b>Discussion</b>        |    |                                                                                                                                                                            |                                                                     |
| Key results              | 18 | Summarise key results with reference to study objectives                                                                                                                   | Included paragraphs 1-2                                             |
| Limitations              | 19 | Discuss limitations of the study, taking into account sources of potential bias or imprecision. Discuss both direction and magnitude of any potential bias                 | Included <i>Limitations</i>                                         |
| Interpretation           | 20 | Give a cautious overall interpretation of results considering objectives, limitations, multiplicity of analyses, results from similar studies, and other relevant evidence | Included <i>Conclusions</i>                                         |
| Generalisability         | 21 | Discuss the generalisability (external validity) of the study results                                                                                                      | Included <i>Comparison with existing approaches – Hazard ratios</i> |
| <b>Other information</b> |    |                                                                                                                                                                            |                                                                     |
| Funding                  | 22 | Give the source of funding and the role of the funders for the present study and, if applicable, for the original study on which the present article is based              | Included <i>Acknowledgements</i>                                    |
